# Supplementary material for: Luminescence mechanochromism in cyclometallated Ir(iii) complexes containing picolylamine
Source: Royal Society of Chemistry journal article supplement (doi:10.1039/c2dt30699a), 2012-01-01
Supplement: c2dt30699a.pdf [file c2dt30699a.pdf]

# Luminescence Mechanochromism in Cyclometallated Ir(III) Complexes Containing Picolinamine. †

Teresa F. Mastropietro,<sup>a,b</sup> Yogesh J. Yadav,<sup>a,b</sup> Elisabeta Ildyko Szerb,<sup>a,b</sup> Anna Maria Talarico,<sup>\*a,b</sup> Mauro Ghedini,<sup>a,b</sup> and Alessandra Crispini<sup>b,c</sup>

5

## Supporting Information.

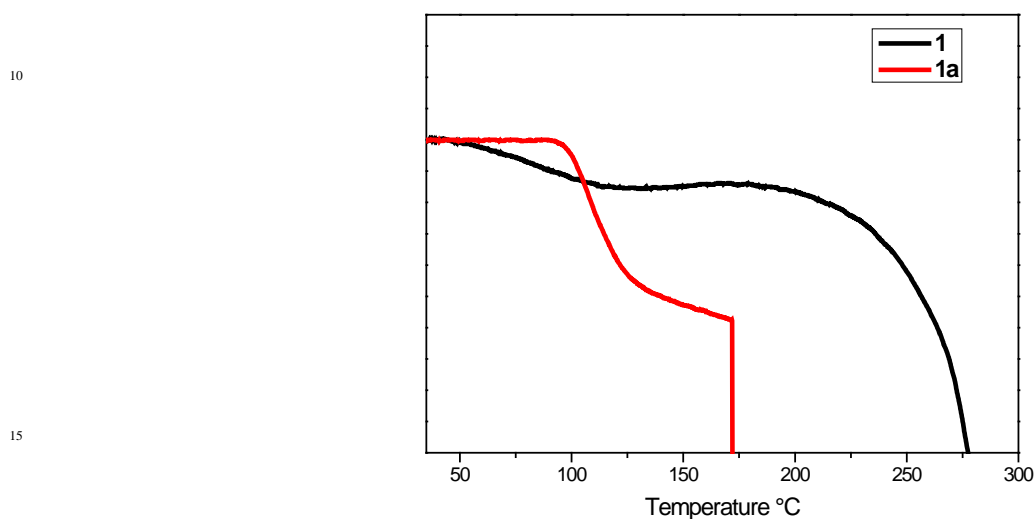

**Figure S1.** TGA traces of powder complex **1** (experimental mass loss 2.78% corresponds to one water molecule calcd. 2.72%) and crystals **1a** (experimental mass loss 6.54 % corresponds to one ethanol molecule calcd. 6.67%)

20

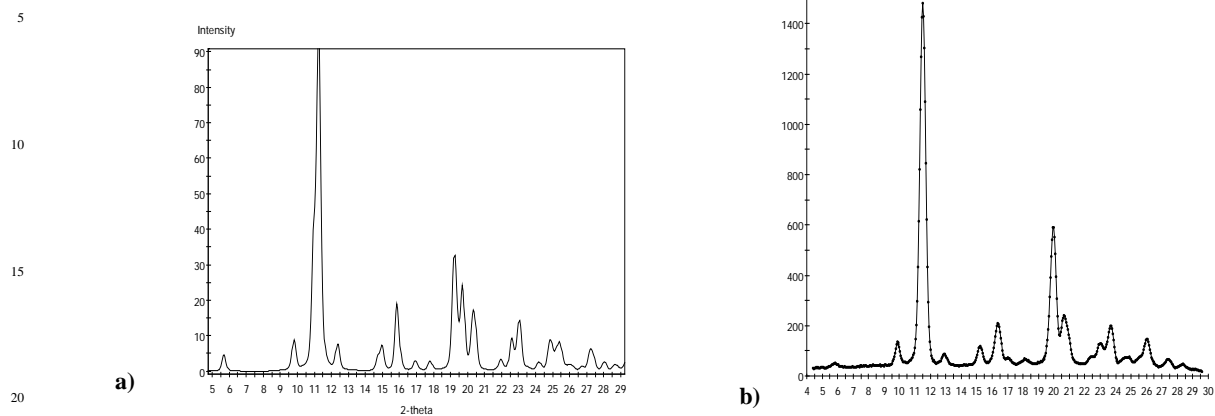

25 **Figure S2.** Simulated PXRD pattern of **2** (a) and collected on the yellow crystalline powder of **2** (b).

30

35

40

45

50

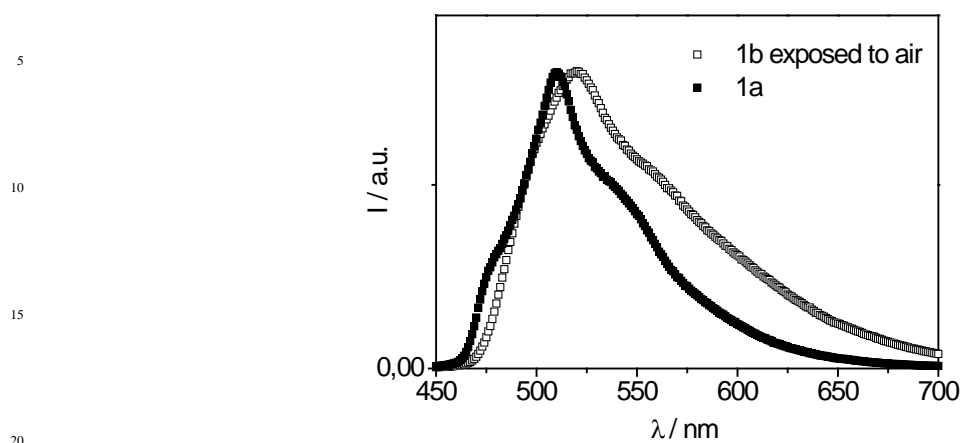

**Figure S3.** Emission spectrum of: (□) crystals **1b** after complete solvatomorphic transformation and (●) crystals **1a**

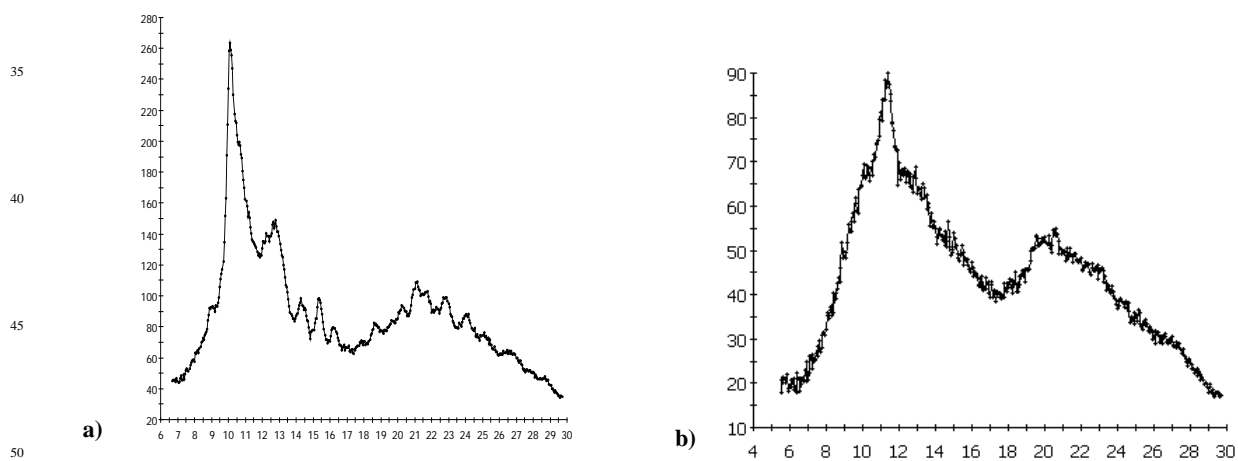

**Figure S4.** Measured PXRD patterns of a grinded sample of **1b** (a) and **2** (b).

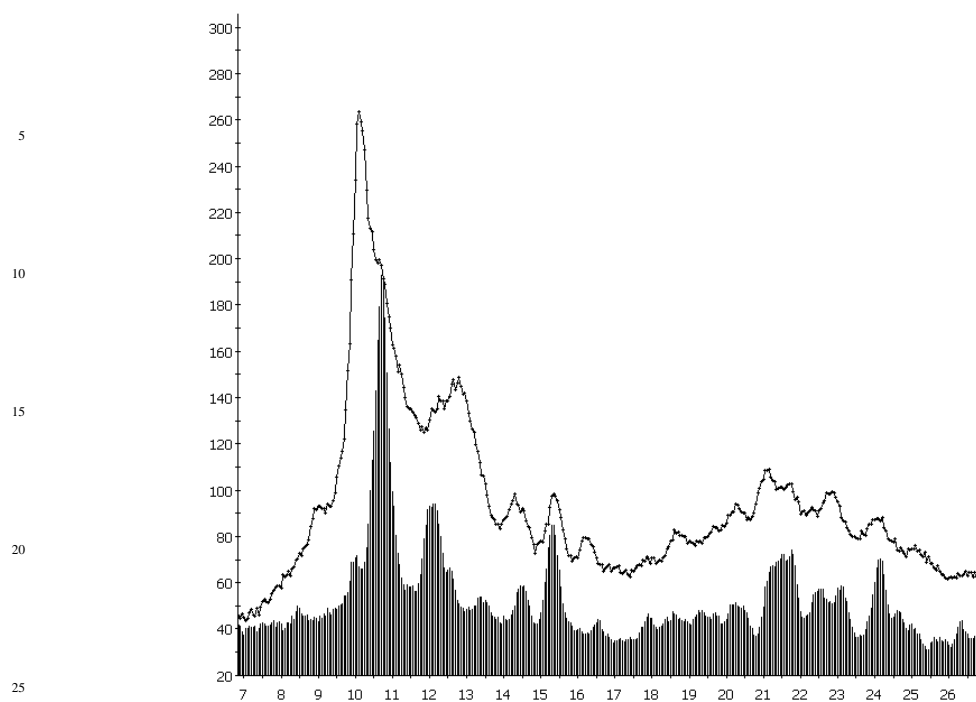

30 **Figure S5.** Measured PXRD pattern of a grinded sample of **1b** superimposed with the one measured on the orange **1b** crystals after transformation in air.

**Table S1.** Crystal data and selected structure refinement parameters for **1a**, **1b**, **2** and **3**.

| Compound                            | <b>1a</b>                                            | <b>1b</b>                                          | <b>2</b>                                                          | <b>3</b>                                                          |
|-------------------------------------|------------------------------------------------------|----------------------------------------------------|-------------------------------------------------------------------|-------------------------------------------------------------------|
| empirical formula                   | C <sub>30</sub> H <sub>30</sub> ClIrN <sub>4</sub> O | C <sub>28</sub> H <sub>24</sub> ClIrN <sub>4</sub> | C <sub>28</sub> H <sub>24</sub> F <sub>6</sub> IrN <sub>4</sub> P | C <sub>28</sub> H <sub>24</sub> ClIrN <sub>4</sub> O <sub>4</sub> |
| Crystal system                      | Monoclinic                                           | Orthorhombic                                       | Orthorhombic                                                      | Orthorhombic                                                      |
| Space group                         | P2(1)/c                                              | P2(1)2(1)2(1)                                      | pca(2)1                                                           | pca(2)1                                                           |
| Z                                   | 4                                                    | 4                                                  | 4                                                                 | 4                                                                 |
| fw                                  | 690.23                                               | 644.16                                             | 753.68                                                            | 708.16                                                            |
| a, Å                                | 14.2312(13)                                          | 9.8167(17)                                         | 11.0809(13)                                                       | 11.0556(10)                                                       |
| b, Å                                | 11.7771(11)                                          | 13.747(3)                                          | 15.5306(18)                                                       | 15.2516(15)                                                       |
| c, Å                                | 19.2326(18)                                          | 20.447(4)                                          | 16.1226(19)                                                       | 15.3882(14)                                                       |
| α, β, γ, deg                        | 90,<br>104.770(4), 90                                | 90, 90, 90                                         | 90, 90, 90                                                        | 90, 90, 90                                                        |
| V, Å <sup>3</sup>                   | 3116.9(5)                                            | 2759.3(9)                                          | 2774.6(6)                                                         | 2594.7(4)                                                         |
| D <sub>c</sub> , g cm <sup>-3</sup> | 1.471                                                | 1.551                                              | 1.804                                                             | 1.813                                                             |
| μ, mm <sup>-1</sup>                 | 4.396                                                | 4.957                                              | 4.935                                                             | 5.291                                                             |
| Independent reflections [R(int)]    | 6109 [0.0504]                                        | 4749 [0.0811]                                      | 4876 [0.0473]                                                     | 5648 [0.0403]                                                     |
| Data/restraints/parameters          | 6109 / 0 / 361                                       | 4749 / 0 / 295                                     | 4876 / 1 / 358                                                    | 5648 / 1 / 331                                                    |
| Goodness-of-fit on F <sup>2</sup>   | 1.258                                                | 0.859                                              | 1.170                                                             | 1.215                                                             |
| Absolute structure parameter        | -                                                    | 0.02(1)                                            | 0.087(8)                                                          | 0.002(7)                                                          |
| <sup>a</sup> R1 [I > 2 σ (I)]       | 0.0372                                               | 0.0429                                             | 0.0261                                                            | 0.0184                                                            |
| <sup>b,c</sup> wR2                  | 0.1377                                               | 0.1017                                             | 0.0751                                                            | 0.0474                                                            |

<sup>a</sup>R1 =  $\sum ||F_o| - |F_c|| / \sum |F_o|$ . <sup>b</sup>wR2 =  $\{ \sum [w(F_o^2 - F_c^2)^2] / [\sum (w(F_o^2)^2)] \}^{1/2}$ . <sup>c</sup>w =  $1 / [ \sigma^2(F_o^2) + (aP)^2 + bP ]$  with  $P = [F_o^2 + 2F_c^2] / 3$ ,  $a = 0.0860$  (**1a**), 0.0812 (**1b**), 0.0627 (**2**), 0.0216 (**3**) and  $b = 7.6815$  (**1a**), 0.0000 (**1b**), 0.06647 (**2**), 1.2086 (**3**).

**Table S2.** Selected distances (Å) and angles (°) in **1a-3**

|                   | <b>1a</b> | <b>1b</b> | <b>2</b> | <b>3</b> |
|-------------------|-----------|-----------|----------|----------|
| Ir(1)-C(11)       | 2.026(7)  | 2.03(1)   | 2.041(5) | 2.014(4) |
| Ir(1)-C(22)       | 2.022(8)  | 2.03(1)   | 2.046(6) | 2.005(4) |
| Ir(1)-N(1)        | 2.101(6)  | 2.05(1)   | 2.072(4) | 2.052(3) |
| Ir(1)-N(2)        | 2.065(6)  | 2.028(5)  | 2.072(5) | 2.041(3) |
| Ir(1)-N(3)        | 2.229(5)  | 2.20(1)   | 2.207(5) | 2.192(4) |
| Ir(1)-N(4)]       | 2.174(6)  | 2.15(1)   | 2.170(5) | 2.124(2) |
|                   |           |           |          |          |
| N(1)-Ir(1)-N(2)   | 172.8(2)  | 174.5(3)  | 174.1(2) | 174.2(1) |
| N(1)-Ir(1)-N(3)   | 98.7(2)   | 97.5(3)   | 98.6(2)  | 98.8(1)  |
| N(1)-Ir(1)-N(4)   | 88.8(2)   | 86.2(3)   | 87.1(2)  | 85.5(1)  |
| N(2)-Ir(1)-N(3)   | 87.0(2)   | 86.6(3)   | 86.4(2)  | 86.8(2)  |
| N(2)-Ir(1)-N(4)   | 96.7(3)   | 97.5(3)   | 97.0(2)  | 97.3(1)  |
| N(4)-Ir(1)-N(3)   | 77.3(2)   | 77.9(3)   | 77.0(2)  | 77.6(1)  |
| C(11)-Ir(1)-C(22) | 90.0(3)   | 91.6(4)   | 87.4(2)  | 86.9(2)  |
| C(11)-Ir(1)-N(1)  | 80.6(3)   | 80.5(4)   | 79.0(2)  | 79.6(1)  |
| C(11)-Ir(1)-N(2)  | 94.1(3)   | 95.0(4)   | 96.1(2)  | 94.8(2)  |
| C(11)-Ir(1)-N(3)  | 174.4(3)  | 174.4(4)  | 175.8(2) | 177.0(1) |
| C(11)-Ir(1)-N(4)  | 97.1(3)   | 96.7(3)   | 99.4(2)  | 99.8(1)  |
| C(22)-Ir(1)-N(1)  | 94.4(3)   | 96.6(4)   | 95.9(2)  | 97.7(1)  |
| C(22)-Ir(1)-N(2)  | 80.6(3)   | 80.2(4)   | 80.4(2)  | 80.2(2)  |
| C(22)-Ir(1)-N(3)  | 95.6(2)   | 93.9(4)   | 96.3(2)  | 95.9(1)  |
| C(22)-Ir(1)-N(4)  | 172.6(2)  | 171.6(3)  | 172.9(2) | 173.2(1) |

**Table S3.** N-H...Cl interactions in **1a**.

---

|                                  | H...A | D...A   | <(DHA) |
|----------------------------------|-------|---------|--------|
| N(3)-H(3a)...Cl(1)               | 2.646 | 3.46(1) | 151.20 |
| N(3)-H(3b)...Cl(1) <sup>i</sup>  | 2.751 | 3.50(1) | 141.85 |
| <sup>s</sup> O(1)-H(1a)...Cl(1)  | 2.273 | 3.09(1) | 172.89 |
| O(2)-H(2A)...Cl(1) <sup>ii</sup> | 1.879 | 2.69(1) | 167.11 |

*i* = -x+2, y-1/2, -z+1/2

*ii* = -x+1, y-1/2, -z+1/2

---

10

15

20

25
